# Supplementary material for: Exploring Heparanase Levels in Tears: Insights From Herpes Simplex Virus-1 Keratitis Patients and Animal Studies
Source: PubMed Central journal article supplement — Invest Ophthalmol Vis Sci. 2024 Mar 11;65(3):7. doi: 10.1167/iovs.65.3.7 (PMC10929742; doi:10.1167/iovs.65.3.7), 2024-03-11
Supplement: iovs-65-3-7_s001.pdf [file iovs-65-3-7_s001.pdf]

**Supplementary File No.01: Clinical examination of clinically suspected patients diagnosed with HSV-1 keratitis**

| Sl. No. | Infected eye Units mL <sup>-1</sup> | Contralateral eye Units mL <sup>-1</sup> | Diagnosis                                                                                                                   | Clinical examination                                                                                                                                                                                                                                                                        |
|---------|-------------------------------------|------------------------------------------|-----------------------------------------------------------------------------------------------------------------------------|---------------------------------------------------------------------------------------------------------------------------------------------------------------------------------------------------------------------------------------------------------------------------------------------|
| 1       | 1.056                               | 0.33                                     | Sclero Keratitis                                                                                                            | Nebulo macular scarring with peripheral vascularisation                                                                                                                                                                                                                                     |
| 2       | 1.853                               | 1.769                                    | Necrotizing Stromal Keratitis                                                                                               | Conjunctival congestion +++, GHJ well apposed, graft infiltrate                                                                                                                                                                                                                             |
| 3       | 0.94                                | 0.65                                     | Epithelial Keratitis                                                                                                        | 360-degree ciliary congestion, Diffuse stromal edema, vascularisation nasally around 8 o clock, DM fold, pigments on endothelium                                                                                                                                                            |
| 4       | 1.005                               | 1.498                                    | Recurrent Deep stromal keratitis                                                                                            | <b>OD:</b> Macular grading scar centrally with edema,<br><b>OS:</b> Mild conjunctival congestion with deep stromal edema and vascularisation                                                                                                                                                |
| 5       | 3.57                                | 1.08                                     | Endotheliitis off treatment                                                                                                 | Few old KPs pigments on endothelium                                                                                                                                                                                                                                                         |
| 6       | 1.686                               | 1.198                                    | OD: Immune Stromal Keratitis<br>OS: Endothelitis                                                                            | <b>OD:</b> Conjunctival congestion (C++), Stromal edema (+), paracentral scar 2*5mm +;<br><b>OS:</b> Nebular corneal scar+ inferiorly 1*1mm                                                                                                                                                 |
| 7       | 1.034                               | 0.48                                     | Endothelitis                                                                                                                | Stroma edema with surrounding scarring Para centrally at infero-temporal cornea, Bullae present, pigments on endothelium, Old KPS are noted inferiorly corneal sensation reduced                                                                                                            |
| 8       | 1.15                                | 0.942                                    | Recurrent Deep Stromal Keratitis                                                                                            | Conjunctival congestion (C+++), Broken dendrite inferiorly with focal FS+ve with few fragments, Diffuse SPks overall                                                                                                                                                                        |
| 9       | 1.67                                | 1.16                                     | Recurrent Deep Stromal Keratitis on Acivir tab                                                                              | Temporal macular scar involving 1/3rd of pupil with deep vascularisation                                                                                                                                                                                                                    |
| 10      | 0.86                                | 0.82                                     | Resolving Epithelial keratitis on ACV                                                                                       | Conjunctival congestion (C+) Fleshy mass encroaching nasally, Dendritic epithelial defects nasally peripheral nebular scars with vascularisation                                                                                                                                            |
| 11      | 1.695                               | 1.67                                     | Endothelitis                                                                                                                | Pigmented conjunctiva, Multiple nebular scars in cornea involving visual axis, Epithelial bullae with stromal scarring and KP's on endothelium                                                                                                                                              |
| 12      | 1.79                                | 1.18                                     | ACV Recurrence Endotheliitis                                                                                                | central scarring with pigments on endothelium KP's present Multiple bullae present stromal edema central corneal mid stromal infiltrate+ overlying epi defect of 1*1.8mm and corresponding area of corneal thinning+ Hypopyon +                                                             |
| 13      | 2                                   | 2.58                                     | Diffuse Endotheliitis                                                                                                       | Scarring, few Keratitic precipitates                                                                                                                                                                                                                                                        |
| 14      | 3.398                               | 0.925                                    | Large central leucomatous corneal scar, central stromal edema, extensive deep stromal vascularisation and lipid keratopathy | Corneal sensation LE diminished Central leucomatous scarring, stromal edema, extensive 4 quadrants of deep vascularisation, lipid keratopathy Central leucomatous scarring, stromal edema, extensive 4 quadrants of deep vascularisation, lipid keratopathy- Aqueous chamber                |
| 15      | 2.086                               | 1.00                                     | Recurrent Epithelial defect                                                                                                 | Corneal sensation +, leucomatous corneal scar centrally with surrounding edema, vascularization temporally extending upto scar, 1 filament superiorly, few dendritic lesion                                                                                                                 |
| 16      | 1.15                                | 1.56                                     | Epithelial Keratitis                                                                                                        | Conjunctival congestion, more prominent nasally with chemosis, Central edema with whitish lesion Para centrally involving visual axis, deep and superficial vascularisation Geographical ulcer nasally 4x2 mm epithelial defect V* H 2.5*2mm                                                |
| 17      | 3.48                                | 2.71                                     | OU Recurrent Epithelial keratitis                                                                                           | <b>OD:</b> Stromal scarring with superficial vascularization 360-degree mid stromal Dotted lesions with cellularity + inferior- paracentral,<br><b>OS:</b> Stromal scarring with superficial vascularization 360-degree mid stromal Dotted lesions with cellularity + inferior- paracentral |

|    |       |       |                                               |                                                                                                                                                                                                                                                                                                                                  |
|----|-------|-------|-----------------------------------------------|----------------------------------------------------------------------------------------------------------------------------------------------------------------------------------------------------------------------------------------------------------------------------------------------------------------------------------|
| 18 | 0.979 | 2.735 | Epithelial and Immune Stromal Keratitis       | Conjunctival congestion, Central epithelial (H*V 4*3.4) defect surrounded by cellularity                                                                                                                                                                                                                                         |
| 19 | 3.96  | 1.20  | Recurrent Chronic Endotheliitis/Keratouveitis | 360-degree scarring                                                                                                                                                                                                                                                                                                              |
| 20 | 1.342 | 1.185 | Deep Stromal Keratitis                        | <b>OD:</b> conjunctival congestion, ring shaped deep stromal infiltrate centrally with vascularisation;<br><b>OS:</b> Faint nebular grade scarring superiorly, minimally obscuring VA                                                                                                                                            |
| 21 | 0.67  | 0.33  | Recurrent Deep Stromal Keratitis              | Diffuse macular scar with mild edema inferiorly                                                                                                                                                                                                                                                                                  |
| 22 | 0.42  | 2.64  | Recurrent Deep Stromal Keratitis              | Mid Stromal Scarring Temporal and Inferiorly with Deep Vascularization<br>RE shows dense stromal scarring with mid stromal edema<br>Old KPs noted<br>Superficial vascularization noted temporally<br>Likely reactivation of HSV infection/interstitial keratitis                                                                 |
| 23 | 1.853 | 1.769 | Immune Stromal Keratitis                      | Macular scarring with superficial vascularization, mild stromal edema, KP's on endo Multiple stromal scars at various levels with pigmented KP on the endothelium, Stromal edema noted with leash of deep stromal vessels present at 9 o'clock<br>stromal edema reduced<br>Imp- LE Immune mediated stromal keratitis- responding |
| 24 | 0.94  | 0.65  | Recurrent Deep Stromal Keratitis              | corneal edema, epithelial defect centrally, nebulomacular scarring centrally                                                                                                                                                                                                                                                     |
| 25 | 1.342 | 1.185 | Endotheliitis                                 | <b>OD:</b> Stromal edema, macular scar centrally<br><b>OS:</b> Macular scar centrally                                                                                                                                                                                                                                            |
| 26 | 0.44  | 0.49  | Endotheliitis                                 | Inferior scarring Few spk's ,                                                                                                                                                                                                                                                                                                    |
| 27 | 0.19  | 1.53  | Resolving Epithelial Keratitis                | Conjunctival congestion (+), Superiorly corneal edema with Surface epithelial defect 4.8x8.1mm                                                                                                                                                                                                                                   |
| 28 | 0.27  | 0.24  | Epithelial Keratitis                          | Resolved epithelial defect, DM folds, KP's on endothelium, mild stromal haze AC: hypopyon                                                                                                                                                                                                                                        |
| 29 | 3.40  | 0.92  | Immune Stromal Keratitis                      | Conjunctival congestion (C++), Micro cystic edema, DM folds, Small multiple infiltrates with epithelial defect measuring 1.5*1 mm at nasally, Incisional scar at 9 o'clock                                                                                                                                                       |
| 30 | 0.39  | 0.38  | Recurrent Epithelial Keratitis                | Dendritic epithelial defect superior nasal area Reduced Corneal sensation Mild corneal edema noted centrally has 2 dendritic lesions at 11 and 12 o'clock                                                                                                                                                                        |
