# Supplementary material for: Exploring Heparanase Levels in Tears: Insights From Herpes Simplex Virus-1 Keratitis Patients and Animal Studies
Source: PubMed Central journal article supplement — Invest Ophthalmol Vis Sci. 2024 Mar 11;65(3):7. doi: 10.1167/iovs.65.3.7 (PMC10929742; doi:10.1167/iovs.65.3.7), 2024-03-11
Supplement: iovs-65-3-7_s002.pdf [file iovs-65-3-7_s002.pdf]

**Supplementary file No.2: Tear Heparanase level in clinically diagnosed cases of HSV-1 keratitis**

| <b>Epithelial Keratitis (n=8)</b> |                     |                          |                                                                                                                             |
|-----------------------------------|---------------------|--------------------------|-----------------------------------------------------------------------------------------------------------------------------|
| <b>Sl. No.</b>                    | <b>Infected eye</b> | <b>Contralateral eye</b> | <b>Diagnosis</b>                                                                                                            |
| 1                                 | 0.94                | 0.65                     | OU Scarring                                                                                                                 |
| 2                                 | 0.86                | 0.82                     | Epithelial keratitis resolving on ACV ointment                                                                              |
| 3                                 | 2.086               | 1.000                    | Recurrent Epithelial defect (Geographic Ulcer)                                                                              |
| 4                                 | 1.15                | 1.56                     | Geographical ulcer                                                                                                          |
| 5                                 | 3.48                | 2.71                     | OU Recurrence post vaccine with Multiple subepithelial scarring with superficial vascularisation                            |
| 6                                 | 0.19                | 1.53                     | Resolving HSV Geographic ulcer                                                                                              |
| 7                                 | 0.39                | 0.38                     | Recurrent Epithelial Keratitis                                                                                              |
| 8                                 | 0.27                | 0.24                     | Neurotrophic ulcer                                                                                                          |
| <b>Stromal Keratitis (n=11)</b>   |                     |                          |                                                                                                                             |
| 1                                 | 1.769               | 1.853                    | HSV Necrotising Stromal Keratitis                                                                                           |
| 2                                 | 1.498               | 1.005                    | Recurrent Deep stromal keratitis                                                                                            |
| 3                                 | 0.942               | 1.15                     | Recurrent HSV Deep Stromal Keratitis                                                                                        |
| 4                                 | 1.16                | 1.67                     | Recurrent HSV Deep Stromal Keratitis on ACV tab                                                                             |
| 5                                 | 0.925               | 3.398                    | Large central leucomatous corneal scar, central stromal edema, extensive deep stromal vascularisation and lipid keratopathy |
| 6                                 | 1.185               | 1.342                    | HSV Deep Stromal Keratitis                                                                                                  |
| 7                                 | 0.33                | 0.67                     | HSV Deep Stromal Keratitis recurrent                                                                                        |
| 8                                 | 2.64                | 0.42                     | Recurrent Deep Stromal Keratitis with dense stromal scarring and mild stromal edema                                         |
| 9                                 | 1.769               | 1.853                    | HSV Immune Stromal Keratitis                                                                                                |
| 10                                | 0.65                | 0.94                     | HSV Deep Stromal Keratitis recurrent                                                                                        |
| 11                                | 0.92                | 3.40                     | Immune stromal keratitis                                                                                                    |
| <b>Endotheliitis (n=8)</b>        |                     |                          |                                                                                                                             |
| 1                                 | 3.57                | 1.08                     | Old cases of HSV Endotheliitis, off treatment                                                                               |
| 2                                 | 1.034               | 0.48                     | HSV-Endotheliitis                                                                                                           |
| 3                                 | 1.695               | 1.67                     | HSV endotheliitis                                                                                                           |
| 4                                 | 1.79                | 1.18                     | Recurrent Endotheliitis, recurrence on ACV                                                                                  |
| 5                                 | 2                   | 2.58                     | Diffuse endothelitis                                                                                                        |
| 6                                 | 3.96                | 1.20                     | Recurrent chronic HSV keratouveitis / endotheliitis                                                                         |
| 7                                 | 1.342               | 1.185                    | HSV Endothelitis                                                                                                            |
| 8                                 | 0.44                | 0.49                     | HSV Endothelitis                                                                                                            |
| <b>Mixed HSV-1 (n=3)</b>          |                     |                          |                                                                                                                             |
| 1                                 | 1.056               | 0.33                     | Sclero keratitis                                                                                                            |
| 2                                 | 1.686               | 1.198                    | OD: Immune Stromal Keratitis and OS Endothelitis                                                                            |
| 3                                 | 0.979               | 2.735                    | Epithelial and Immune Stromal Keratitis                                                                                     |
