# Supplementary material for: Exploring Heparanase Levels in Tears: Insights From Herpes Simplex Virus-1 Keratitis Patients and Animal Studies
Source: PubMed Central journal article supplement — Invest Ophthalmol Vis Sci. 2024 Mar 11;65(3):7. doi: 10.1167/iovs.65.3.7 (PMC10929742; doi:10.1167/iovs.65.3.7), 2024-03-11
Supplement: iovs-65-3-7_s003.pdf [file iovs-65-3-7_s003.pdf]

**Supplementary File No.03: Tear Heparanase levels in microbiologically confirmed and clinically diagnosed cases of Bacterial and Fungal Keratitis**

| SL. No. | Bacterial Keratitis (units/mL) | Fungal Keratitis (units/mL) |
|---------|--------------------------------|-----------------------------|
| 1       | 0.06                           | 0.01                        |
| 2       | 0.13                           | 0.07                        |
| 3       | 0.23                           | 0.08                        |
| 4       | 0.24                           | 0.1                         |
| 5       | 0.35                           | 0.12                        |
| 6       | 0.37                           | 0.13                        |
| 7       | 0.38                           | 0.15                        |
| 8       | 0.39                           | 0.24                        |
| 9       | 0.46                           | 0.26                        |
| 10      | 0.52                           | 0.35                        |
| 11      | 0.56                           | 0.35                        |
| 12      | 0.58                           | 0.39                        |
| 13      | 0.58                           | 0.4                         |
| 14      | 0.61                           | 0.44                        |
| 15      | 0.7                            | 0.45                        |
| 16      | 0.72                           | 0.51                        |
| 17      | 0.75                           | 0.607                       |
| 18      | 0.77                           | 0.62                        |
| 19      | 0.87                           | 0.76                        |
| 20      | 0.89                           | 0.84                        |
| 21      | 0.91                           | 1.03                        |
| 22      | 1.82                           | 0.86                        |
| 23      | 4.70                           | 1.64                        |
| 24      | 1.08                           | 1.48                        |
| 25      | 1.02                           | 1.88                        |
| 26      | 2.15                           | 1.15                        |
| 27      | 0.91                           | 0.86                        |
| 28      | 0.99                           | 1.30                        |
| 29      | 1.03                           | 1.23                        |
| 30      | 1.36                           | 1.01                        |
