# Supplementary material for: Exploring Heparanase Levels in Tears: Insights From Herpes Simplex Virus-1 Keratitis Patients and Animal Studies
Source: PubMed Central journal article supplement — Invest Ophthalmol Vis Sci. 2024 Mar 11;65(3):7. doi: 10.1167/iovs.65.3.7 (PMC10929742; doi:10.1167/iovs.65.3.7), 2024-03-11
Supplement: iovs-65-3-7_s004.pdf [file iovs-65-3-7_s004.pdf]

## Supplementary File No.4: Tear Heparanase activity in C57BL/6 mice

### A: Non-infected Eye vs Infected Eye

| Days post infection | Non-infected Eye<br>(Nanogram HS<br>removed min <sup>-1</sup> ) | Infected Eye<br>(Nanogram HS<br>removed min <sup>-1</sup> ) | p-value |
|---------------------|-----------------------------------------------------------------|-------------------------------------------------------------|---------|
| Day 0               | 0.70                                                            | 0.66                                                        | 0.99    |
| Day 1               | 2.87                                                            | 5.16                                                        | 0.002   |
| Day 2               | 4.46                                                            | 5.22                                                        | 0.252   |
| Day 4               | 5.01                                                            | 5.28                                                        | 0.712   |
| Day 6               | 4.27                                                            | 5.24                                                        | 0.099   |
| Day 8               | 3.82                                                            | 5.73                                                        | 0.0006  |
| Day 10              | 3.67                                                            | 5.73                                                        | 0.0343  |

### B: Contralateral Eye vs Infected Eye

| Days post infection | Contralateral Eye<br>(Nanogram HS<br>removed min <sup>-1</sup> ) | Infected Eye<br>(Nanogram HS<br>removed min <sup>-1</sup> ) | p-value |
|---------------------|------------------------------------------------------------------|-------------------------------------------------------------|---------|
| Day 0               | 0.56                                                             | 0.66                                                        | 0.282   |
| Day 1               | 4.23                                                             | 5.16                                                        | 0.087   |
| Day 2               | 5.57                                                             | 5.22                                                        | 0.914   |
| Day 4               | 5.49                                                             | 5.28                                                        | 0.981   |
| Day 6               | 5.76                                                             | 5.24                                                        | 0.444   |
| Day 8               | 5.41                                                             | 5.73                                                        | 0.36    |
| Day 10              | 5.87                                                             | 5.73                                                        | 0.997   |

### C: Non-infected Eye vs Contralateral Eye

| Days post infection | Non-infected Eye<br>(Nanogram HS<br>removed min <sup>-1</sup> ) | Contralateral Eye<br>(Nanogram HS<br>removed min <sup>-1</sup> ) | p-value |
|---------------------|-----------------------------------------------------------------|------------------------------------------------------------------|---------|
| Day 0               | 0.70                                                            | 0.56                                                             | 0.626   |
| Day 1               | 2.87                                                            | 4.22                                                             | 0.071   |
| Day 2               | 4.46                                                            | 5.56                                                             | 0.116   |
| Day 4               | 5.01                                                            | 5.49                                                             | 0.656   |
| Day 6               | 4.27                                                            | 5.76                                                             | 0.013   |
| Day 8               | 3.82                                                            | 5.41                                                             | 0.002   |
| Day 10              | 3.67                                                            | 5.87                                                             | 0.014   |
